# Supplementary material for: Migration in the social stage of Dictyostelium discoideum amoebae impacts competition
Source: PeerJ. 2015 Oct 22;3:e1352. doi: 10.7717/peerj.1352 (PMC4627915; doi:10.7717/peerj.1352)
Supplement: Supplemental Information 2 — The tabs labeled sporeMig are the raw datasets collected from the migration plates. There are two tabs, one for chimeric data and one for clonal data. The tabs labeled with Morph are the morphometric datasets for the clonal and chimeric fruiting bodies. [file peerj-03-1352-s002.xlsx]

## Sheet: sporeMig-clonal
Clone	Type	Treat	Replicate	Cell number	Spore number	sporulation efficiency	zone0	zone1	zone2	zone3	zone4	zone5	zone6	Total Frutiting bodies	Average Distance
28	Anc	NM	1	9.7e+06	1375000	0.141753	167	53	0	0	0	0	0	220	0.481818
34	Anc	NM	1	7450000	1875000	0.251678	206	4	0	0	0	0	0	210	0.0380952
63	Anc	NM	1	10800000	1325000	0.122685	133	9	0	0	0	0	0	142	0.126761
85	Anc	NM	1	10600000	1750000	0.165094	479	69	0	0	0	0	0	548	0.251825
105	Anc	NM	1	10400000	1750000	0.168269	204	12	0	0	0	0	0	216	0.111111
28	Anc	M	1	9700000	325000	0.0335052	26	39	266	104	0	0	0	435	4.05977
34	Anc	M	1	7450000	100000	0.0134228	0	7	9	33	58	123	0	230	8.44348
63	Anc	M	1	10800000	350000	0.0324074	76	188	65	6	0	0	0	335	2.00597
85	Anc	M	1	10600000	900000	0.0849057	123	425	460	24	0	0	0	1032	2.74612
105	Anc	M	1	10400000	325000	0.03125	28	84	13	45	68	141	35	414	6.91787
28.2	RFP	NM	1	10750000	2100000	0.195349	298	134	0	0	0	0	0	432	0.62037
34.3	RFP	NM	1	9750000	3875000	0.397436	369	42	0	0	0	0	0	411	0.20438
63.2	RFP	NM	1	7300000	3175000	0.434932	288	0	0	0	0	0	0	288	0
85.2	RFP	NM	1	11750000	3100000	0.26383	415	248	18	0	0	0	0	681	0.834068
105.2	RFP	NM	1	7650000	3550000	0.464052	389	15	0	0	0	0	0	404	0.0742574
28.2	RFP	M	1	10750000	1325000	0.123256	28	108	235	237	9	6	0	623	4.34992
34.3	RFP	M	1	9750000	425000	0.0435897	26	155	40	66	147	163	13	610	6.27541
63.2	RFP	M	1	7300000	475000	0.0650685	56	34	25	172	326	119	0	732	6.82787
85.2	RFP	M	1	11750000	325000	0.0276596	264	516	274	5	0	0	0	1059	2.03777
105.2	RFP	M	1	7650000	1350000	0.176471	54	75	44	89	110	152	68	592	6.88514
28	Anc	NM	2	4920000	2050000	0.416667	155	0	0	0	0	0	0	155	0
34	Anc	NM	2	11600000	4600000	0.396552	155	9	0	0	0	0	0	164	0.109756
63	Anc	NM	2	5180000	750000	0.144788	101	0	0	0	0	0	0	101	0
85	Anc	NM	2	4.65e+06	950000	0.204301	108	0	0	1	0	0	0	109	0.0550459
105	Anc	NM	2	3430000	1200000	0.349854	114	0	0	0	0	0	0	114	0
28	Anc	M	2	4920000	400000	0.0813008	33	20	11	17	65	149	0	295	7.44407
34	Anc	M	2	11600000	2100000	0.181034	3	12	30	24	47	129	0	245	7.97551
63	Anc	M	2	5180000	750000	0.144788	10	13	16	23	72	90	0	224	7.60714
85	Anc	M	2	4.65e+06	450000	0.0967742	6	15	23	127	76	20	0	267	6.33708
105	Anc	M	2	3430000	500000	0.145773	6	8	7	13	20	35	47	136	8.79412
28.2	RFP	NM	2	8.7e+06	4400000	0.505747	209	0	0	0	0	0	0	209	0
34.3	RFP	NM	2	8850000	2150000	0.242938	156	0	0	0	0	0	0	156	0
63.2	RFP	NM	2	7500000	3200000	0.426667	110	0	0	0	0	0	0	110	0
85.2	RFP	NM	2	7300000	5200000	0.712329	291	32	0	0	0	0	0	323	0.198142
105.2	RFP	NM	2	10500000	1900000	0.180952	136	6	0	0	0	0	0	142	0.084507
28.2	RFP	M	2	8.7e+06	1150000	0.132184	24	15	4	7	34	89	0	173	7.22543
34.3	RFP	M	2	8850000	1050000	0.118644	8	14	16	15	36	105	0	194	7.83505
63.2	RFP	M	2	7500000	500000	0.0666667	22	12	3	72	136	100	0	345	7.4087
85.2	RFP	M	2	7300000	1.4e+06	0.191781	12	17	10	42	241	21	0	343	7.18367
105.2	RFP	M	2	10500000	750000	0.0714286	13	18	17	29	50	56	37	220	7.64545
28	Anc	NM	3	5750000	1912500	0.332609	231							231	0
34	Anc	NM	3	6800000	2962500	0.435662	288							288	0
63	Anc	NM	3	5300000	1800000	0.339623	262							262	0
85	Anc	NM	3	4800000	1737500	0.361979	322							322	0
105	Anc	NM	3	4500000	1762500	0.391667	246							246	0
28	Anc	M	3	5750000	187500	0.0326087	40	70	35	50	146	75		416	6.00481
34	Anc	M	3	6800000	1512500	0.222426	12	56	38	24	70	102	6	308	6.68831
63	Anc	M	3	5300000	437500	0.0825472	28	66	61	126	129	28		438	5.57991
85	Anc	M	3	4800000	600000	0.125	20	81	58	89	175	43	10	476	6.04622
105	Anc	M	3	4500000	562500	0.125	8	38	23	24	43	64	45	245	7.49388
28.2	RFP	NM	3	8350000	3175000	0.38024	391							391	0
34.3	RFP	NM	3	13600000	4.9125e+06	0.361213	358							358	0
63.2	RFP	NM	3	7300000	3662500	0.501712	340							340	0
85.2	RFP	NM	3	6550000	1562500	0.23855	261							261	0
105.2	RFP	NM	3	9.05e+06	3750000	0.414365	344							344	0
28.2	RFP	M	3	8350000	425000	0.0508982	72	144	36	98	182	235	4	771	6.32166
34.3	RFP	M	3	13600000	1200000	0.0882353	14	96	62	76	75	116	108	547	7.22486
63.2	RFP	M	3	7300000	1237500	0.169521	20	95	54	146	75	95	51	536	6.42537
85.2	RFP	M	3	6550000	175000	0.0267176	11	21	17	72	120	33		274	6.68613
105.2	RFP	M	3	9.05e+06	1075000	0.118785	14	58	44	38	45	101	43	343	7.01458
28	Anc	NM	4	6450000	3100000	0.48062	269							269	0
34	Anc	NM	4	5900000	3100000	0.525424	159							159	0
63	Anc	NM	4	5650000	1350000	0.238938	64							64	0
85	Anc	NM	4	7000000	1050000	0.15	208	28						236	0.237288
105	Anc	NM	4	6450000	2725000	0.422481	247							247	0
28	Anc	M	4	6450000	900000	0.139535	9	34	68	144	161	10		426	6.08451
34	Anc	M	4	5900000	312500	0.0529661	0	3	10	23	30	65	56	187	9.3369
63	Anc	M	4	5650000	2612500	0.462389	44	66	4					114	1.29825
85	Anc	M	4	7000000	787500	0.1125	31	31	112	351	105	6		636	5.5283
105	Anc	M	4	6450000	1125000	0.174419	5	32	17	17	98	51		220	6.94545
28.2	RFP	NM	4	5100000	3050000	0.598039	262							262	0
34.3	RFP	NM	4	5050000	3475000	0.688119	241							241	0
63.2	RFP	NM	4	6750000	1300000	0.192593	250							250	0
85.2	RFP	NM	4	4.65e+06	1375000	0.295699	267							267	0
105.2	RFP	NM	4	7200000	2250000	0.3125	269							269	0
28.2	RFP	M	4	5100000	875000	0.171569	6	39	29	119	266	81		540	7.12222
34.3	RFP	M	4	5050000	1137500	0.225248	8	8	16	32	53	110	46	273	8.60073
63.2	RFP	M	4	6750000	875000	0.12963	19	55	44	51	118	103	88	478	7.57741
85.2	RFP	M	4	4.65e+06	737500	0.158602	5	21	64	300	87			477	5.85744
105.2	RFP	M	4	7200000	1937500	0.269097	2	25	71	109	32	37	43	319	6.67712
28	Anc	NM	5	8.45e+06	1600000	0.189349	138	65						203	0.640394
34	Anc	NM	5	8500000	1775000	0.208824	255	23						278	0.165468
63	Anc	NM	5	7900000	2575000	0.325949	222							222	0
85	Anc	NM	5	7000000	1900000	0.271429	226							226	0
105	Anc	NM	5	4.9e+06	1.1e+06	0.22449	193	12						205	0.117073
28	Anc	M	5	8450000	1.1e+06	0.130178	117	100	110	70	21	1		419	2.95465
34	Anc	M	5	8500000	206250	0.0242647	23	31	30	50	28	46	13	221	5.9819
63	Anc	M	5	7900000	268750	0.034019	90	63	63	26	1			243	2.23045
85	Anc	M	5	7000000	618750	0.0883929	93	95	138	208	204	30	9	777	5.18662
105	Anc	M	5	4900000	481250	0.0982143	39	31	55	90	66	1		282	4.8227
28.2	RFP	NM	5	8250000	2375000	0.287879	199							199	0
34.3	RFP	NM	5	7700000	1600000	0.207792	254	29						283	0.204947
63.2	RFP	NM	5	8750000	1325000	0.151429	143	37						180	0.411111
85.2	RFP	NM	5	6200000	1450000	0.233871	125							125	0
105.2	RFP	NM	5	11200000	1700000	0.151786	306							306	0
28.2	RFP	M	5	8250000	931250	0.112879	46	84	87	25	2	9		253	3.05138
34.3	RFP	M	5	7700000	318750	0.0413961	14	19	44	11	47	81	38	254	7.56693
63.2	RFP	M	5	8750000	568750	0.065	35	43	25	76	94	125	55	453	7.2936
85.2	RFP	M	5	6200000	200000	0.0322581	19	17	50	186	73	7		352	5.69318
105.2	RFP	M	5	11200000	537500	0.0479911	93	81	42	51	124	105	1	497	5.41247

## Sheet: sporeMigChimeras
Clone1	Type1	Clone2	Type2	treatment	replicate	cell.mix.no	spore.mix.no	total sporulation efficiency	clone 1 sporulation efficiency	clone 2 sporulation efficiency	cells.red	cells.not red	celL.total	cell.prop.red	c.mix.red	c.mix.not	c.mix.tot	c.mix.prop.red	c.mix.no.red.adj	c.mix.prop.adj	zone0	zone1	zone2	zone3	zone4	zone5	zone6	Total FBS	Average Dist	spore.red	spore.not	spore.total	spore.prop.red	s.mix.red	s.mix.not	s.mix.total	s.mix.prop.red	s.mix.no.red.adj	s.mix.red.prop.adj
28	RFP	34	Anc	NM	1	8500000	2975000	0.35	0.229847	0.52831	30	10	40	0.75	151	186	337	0.448071	201.333	0.597428	258	13						271	0.095941	192	4	196	0.979592	103	165	268	0.384328	105.146	0.392335
28	RFP	63	Anc	NM	1	9750000	4725000	0.484615	0.232279	0.754354	30	10	40	0.75	93	147	240	0.3875	124	0.516667	256	9						265	0.0679245	192	4	196	0.979592	90	281	371	0.242588	91.875	0.247642
28	RFP	85	Anc	NM	1	9650000	900000	0.0932642	0.110222	0.0751765	30	10	40	0.75	120	190	310	0.387097	160	0.516129	478	21						499	0.0841683	192	4	196	0.979592	193	130	323	0.597523	197.021	0.609972
28	RFP	105	Anc	NM	1	10800000	3675000	0.340278	0.251774	0.376839	30	10	40	0.75	82	292	374	0.219251	109.333	0.292335	330	64						394	0.324873	192	4	196	0.979592	82	305	387	0.211886	83.7083	0.216301
34	RFP	63	Anc	NM	1	9150000	1562000	0.17071	0.122704	0.214913	39	4	43	0.906977	110	143	253	0.434783	121.282	0.479376	240	12						252	0.0952381	445	45	490	0.908163	46	101	147	0.312925	50.6517	0.344569
34	RFP	85	Anc	NM	1	12600000	962500	0.0763889	0.102555	0.0506985	39	4	43	0.906977	133	163	296	0.449324	146.641	0.495409	428	31						459	0.135076	445	45	490	0.908163	90	59	149	0.604027	99.1011	0.665108
34	RFP	105	Anc	NM	1	11050000	1675000	0.151584	0.138203	0.158156	39	4	43	0.906977	95	223	318	0.298742	104.744	0.329382	346							346	0	445	45	490	0.908163	120	320	440	0.272727	132.135	0.300306
63	RFP	85	Anc	NM	1	8550000	3500000	0.409357	0.433866	0.379342	70	11	81	0.864198	98	108	206	0.475728	113.4	0.550485	404	18						422	0.0853081	273	26	299	0.913043	285	250	535	0.53271	312.143	0.583445
63	RFP	105	Anc	NM	1	13350000	4900000	0.367041	0.227374	0.450047	70	11	81	0.864198	96	202	298	0.322148	111.086	0.372771	352	36						388	0.185567	273	26	299	0.913043	140	524	664	0.210843	153.333	0.230924
85	RFP	105	Anc	NM	1	12850000	3450000	0.268482	0.185129	0.304957	70	8	78	0.897436	56	149	205	0.273171	62.4	0.30439	477							477	0	499	102	601	0.830283	107	507	614	0.174267	128.872	0.209889
28	RFP	34	Anc	M	1	8500000	512000	0.0602353	0.0382292	0.092893	30	10	40	0.75	151	186	337	0.448071	201.333	0.597428	13	64	41	162	196	64	1	541	6.43993	192	4	196	0.979592	26	44	70	0.371429	26.5417	0.379167
28	RFP	63	Anc	M	1	9750000	925000	0.0948718	0.0603095	0.131818	30	10	40	0.75	93	147	240	0.3875	124	0.516667	23	158	138	132	25			476	3.90756	192	4	196	0.979592	37	78	115	0.321739	37.7708	0.328442
28	RFP	85	Anc	M	1	9650000	537000	0.0556477	0.072784	0.037369	30	10	40	0.75	120	190	310	0.387097	160	0.516129	43	212	333	38				626	3.16933	192	4	196	0.979592	41	21	62	0.66129	41.8542	0.675067
28	RFP	105	Anc	M	1	10800000	1087500	0.100694	0.130603	0.0883391	30	10	40	0.75	82	292	374	0.219251	109.333	0.292335	90	160	92	77	103	170	46	738	5.72629	192	4	196	0.979592	52	88	140	0.371429	53.0833	0.379167
34	RFP	63	Anc	M	1	9150000	285000	0.0311475	0.0300031	0.0322014	39	4	43	0.906977	110	143	253	0.434783	121.282	0.479376	14	59	57	113	187	81		511	6.51663	445	45	490	0.908163	13	18	31	0.419355	14.3146	0.461762
34	RFP	85	Anc	M	1	12600000	158000	0.0125397	0.0147099	0.010409	39	4	43	0.906977	133	163	296	0.449324	146.641	0.495409	26	138	102	65	79	48	5	463	4.85097	445	45	490	0.908163	19	17	36	0.527778	20.9213	0.581149
34	RFP	105	Anc	M	1	11050000	530000	0.0479638	0.0137437	0.0647715	39	4	43	0.906977	95	223	318	0.298742	104.744	0.329382	25	92	22	18	53	117	72	399	7.11278	445	45	490	0.908163	3	32	35	0.0857143	3.30337	0.094382
63	RFP	85	Anc	M	1	8550000	620000	0.0725146	0.0891694	0.0521188	70	11	81	0.864198	98	108	206	0.475728	113.4	0.550485	44	61	125	163	19	10	1	423	4.40662	273	26	299	0.913043	89	55	144	0.618056	97.4762	0.676918
63	RFP	105	Anc	M	1	13350000	1475000	0.110487	0.0889091	0.123311	70	11	81	0.864198	96	202	298	0.322148	111.086	0.372771	12	63	48	48	55	66	98	390	7.38974	273	26	299	0.913043	43	114	157	0.273885	47.0952	0.29997
85	RFP	105	Anc	M	1	12850000	1265000	0.0984436	0.0643966	0.113342	70	8	78	0.897436	56	149	205	0.273171	62.4	0.30439	14	269	200	102	107	111	23	826	5.07506	499	102	601	0.830283	41	207	248	0.165323	49.3808	0.199116
28	RFP	34	Anc	NM	2	11350000	4350000	0.38326	0.439391	0.343124	485	34	519	0.934489	120	188	308	0.38961	128.412	0.416923	204							204	0	201	14	215	0.934884	185	229	414	0.44686	197.886	0.477984
28	RFP	63	Anc	NM	2	10100000	5250000	0.519802	0.346489	0.803612	485	34	519	0.934489	246	178	424	0.580189	263.245	0.620862	138							138	0	201	14	215	0.934884	195	309	504	0.386905	208.582	0.413853
28	RFP	85	Anc	NM	2	10000000	2300000	0.23	0.105151	0.391578	485	34	519	0.934489	592	531	1123	0.527159	633.501	0.564115	199	2						201	0.0199005	201	14	215	0.934884	61	192	253	0.241107	65.2488	0.2579
28	RFP	105	Anc	NM	2	8900000	1950000	0.219101	0.0752866	0.398305	485	34	519	0.934489	464	431	895	0.518436	496.528	0.55478	183							183	0	201	14	215	0.934884	18	83	101	0.178218	19.2537	0.190631
34	RFP	63	Anc	NM	2	9100000	2.75e+06	0.302198	0.207399	0.436294	482	108	590	0.816949	425	463	888	0.478604	520.228	0.585843	130							130	0	188	48	236	0.79661	221	469	690	0.32029	277.426	0.402066
34	RFP	85	Anc	NM	2	7950000	1900000	0.238994	0.122038	0.418391	482	108	590	0.816949	317	324	641	0.49454	388.029	0.60535	134							134	0	188	48	236	0.79661	131	401	532	0.246241	164.447	0.309111
34	RFP	105	Anc	NM	2	9.7e+06	1600000	0.164948	0.0464027	0.255535	482	108	590	0.816949	293	535	828	0.353865	358.651	0.433154	107	6						113	0.106195	188	48	236	0.79661	53	493	546	0.0970696	66.5319	0.121853
63	RFP	85	Anc	NM	2	8100000	950000	0.117284	0.145804	0.0866586	671	117	788	0.851523	347	440	787	0.440915	407.505	0.517796	126	1						127	0.015748	131	34	165	0.793939	254	243	497	0.511066	319.924	0.64371
63	RFP	105	Anc	NM	2	7500000	1500000	0.2	0.198988	0.200875	671	117	788	0.851523	278	426	704	0.394886	326.474	0.463741	60	2	14	11				87	1.44828	131	34	165	0.793939	211	365	576	0.366319	265.763	0.461395
85	RFP	105	Anc	NM	2	9750000	10000000	1.02564	0.449064	1.77895	224	80	304	0.736842	341	476	817	0.417381	462.786	0.566445	454	44						498	0.176707	228	143	371	0.614555	123	684	807	0.152416	200.145	0.248011
28	RFP	34	Anc	M	2	11350000	220500	0.0194273	0.018588	0.0200275	485	34	519	0.934489	120	188	308	0.38961	128.412	0.416923	25	30	18	12	82	92	50	309	7.70227	240	14	254	0.944882	147	243	390	0.376923	155.575	0.39891
28	RFP	63	Anc	M	2	10100000	750000	0.0742574	0.0491486	0.115375	485	34	519	0.934489	246	178	424	0.580189	263.245	0.620862	14	31	15	20	23	45	9	157	6.26752	240	14	254	0.944882	106	167	273	0.388278	112.183	0.410928
28	RFP	85	Anc	M	2	10000000	900000	0.09	0.0327359	0.16411	485	34	519	0.934489	592	531	1123	0.527159	633.501	0.564115	29	44	14	102	157	32		378	6.16931	240	14	254	0.944882	19	79	98	0.193878	20.1083	0.205187
28	RFP	105	Anc	M	2	8900000	2200000	0.247191	0.075229	0.461469	485	34	519	0.934489	464	431	895	0.518436	496.528	0.55478	8	25	8	31	48	41	64	225	8.13333	240	14	254	0.944882	41	216	257	0.159533	43.3917	0.168839
34	RFP	63	Anc	M	2	9100000	1.45e+06	0.159341	0.116678	0.219689	482	108	590	0.816949	425	463	888	0.478604	520.228	0.585843	13	7	24	29	86	66	2	227	7.29515	285	88	373	0.764075	59	121	180	0.327778	77.2175	0.428986
34	RFP	85	Anc	M	2	7950000	1800000	0.226415	0.12432	0.383017	482	108	590	0.816949	317	324	641	0.49454	388.029	0.60535	35	56	39	48	80	56	8	322	5.75155	285	88	373	0.764075	64	188	252	0.253968	83.7614	0.332387
34	RFP	105	Anc	M	2	9.7e+06	3000000	0.309278	0.107825	0.463218	482	108	590	0.816949	293	535	828	0.353865	358.651	0.433154	5	7	4	6	34	95	35	186	9.1828	285	88	373	0.764075	24	184	208	0.115385	31.4105	0.151012
63	RFP	85	Anc	M	2	8100000	550000	0.0679012	0.0937735	0.0401193	671	117	788	0.851523	347	440	787	0.440915	407.505	0.517796	45	18	17	73	125	109		387	6.80103	154	41	195	0.789744	205	158	363	0.564738	259.578	0.715091
63	RFP	105	Anc	M	2	7500000	1500000	0.2	0.149165	0.243961	671	117	788	0.851523	278	426	704	0.394886	326.474	0.463741	26	22	12	19	29	71		179	6.41341	154	41	195	0.789744	59	157	216	0.273148	74.7078	0.345869
85	RFP	105	Anc	M	2	9750000	4800000	0.492308	0.253411	0.804429	224	80	304	0.736842	341	476	817	0.417381	462.786	0.566445	8	86	61	107	84	132		478	6.38075	202	145	347	0.582133	83	406	489	0.169734	142.579	0.291573
28	RFP	34	Anc	NM	3	7500000	2675000	0.356667	0.387962	0.311876	495	12	507	0.976331	519	384	903	0.574751	531.582	0.588684	214							214	0	116	7	123	0.943089	93	61	154	0.603896	98.6121	0.640338
28	RFP	63	Anc	NM	3	9100000	1625000	0.178571	0.149331	0.21216	495	12	507	0.976331	107	98	205	0.521951	109.594	0.534605	205							205	0	116	7	123	0.943089	78	107	185	0.421622	82.7069	0.447064
28	RFP	85	Anc	NM	3	4.6e+06	2775000	0.603261	0.725883	0.450651	495	12	507	0.976331	144	122	266	0.541353	147.491	0.554477	244							244	0	116	7	123	0.943089	56	33	89	0.629213	59.3793	0.667183
28	RFP	105	Anc	NM	3	6700000	3025000	0.451493	0.449439	0.453703	495	12	507	0.976331	124	121	245	0.506122	127.006	0.518392	352							352	0	116	7	123	0.943089	73	77	150	0.486667	77.4052	0.516034
34	RFP	63	Anc	NM	3	8250000	2.075e+06	0.251515	0.157921	0.38275	400	74	474	0.843882	166	171	337	0.492582	196.71	0.583709	175							175	0	123	19	142	0.866197	40	86	126	0.31746	46.1789	0.366499
34	RFP	85	Anc	NM	3	5750000	3050000	0.530435	0.282531	0.952674	400	74	474	0.843882	109	96	205	0.531707	129.165	0.630073	372							372	0	123	19	142	0.866197	25	61	86	0.290698	28.8618	0.335602
34	RFP	105	Anc	NM	3	6000000	2575000	0.429167	0.464718	0.380573	400	74	474	0.843882	77	81	158	0.487342	91.245	0.5775	259							259	0	123	19	142	0.866197	39	33	72	0.541667	45.0244	0.625339
63	RFP	85	Anc	NM	3	4300000	2675000	0.622093	0.519647	0.724619	376	55	431	0.87239	96	124	220	0.436364	110.043	0.500193	261							261	0	164	37	201	0.81592	30	58	88	0.340909	36.7683	0.417822
63	RFP	105	Anc	NM	3	5400000	2725000	0.50463	0.507488	0.501418	376	55	431	0.87239	72	84	156	0.461538	82.5319	0.529051	296							296	0	164	37	201	0.81592	56	73	129	0.434109	68.6341	0.532048
85	RFP	105	Anc	NM	3	8600000	1.1e+06	0.127907	0.0588426	0.253207	307	107	414	0.741546	98	107	205	0.478049	132.156	0.644665	270							270	0	47	36	83	0.566265	22	109	131	0.167939	38.8511	0.296573
28	RFP	34	Anc	M	3	7500000	1425000	0.19	0.206315	0.16665	495	12	507	0.976331	519	384	903	0.574751	531.582	0.588684	161	197	112	96	99	10		675	3.42222	225	13	238	0.945378	84	55	139	0.604317	88.8533	0.639233
28	RFP	63	Anc	M	3	9100000	787500	0.0865385	0.0766537	0.0978932	495	12	507	0.976331	107	98	205	0.521951	109.594	0.534605	28	35	48	40	95	68	19	333	6.51652	225	13	238	0.945378	77	95	172	0.447674	81.4489	0.47354
28	RFP	85	Anc	M	3	4.6e+06	1312500	0.285326	0.36547	0.185582	495	12	507	0.976331	144	122	266	0.541353	147.491	0.554477	103	115	26	151	165	139	33	732	5.93716	225	13	238	0.945378	141	69	210	0.671429	149.147	0.710222
28	RFP	105	Anc	M	3	6700000	500000	0.0746269	0.08832	0.0598878	495	12	507	0.976331	124	121	245	0.506122	127.006	0.518392	65	88	42	35	107	78	27	442	5.68778	225	13	238	0.945378	87	63	150	0.58	92.0267	0.613511
34	RFP	63	Anc	M	3	8250000	675000	0.0818182	0.0905554	0.0695672	400	74	474	0.843882	166	171	337	0.492582	196.71	0.583709	10	32	37	140	197	193	8	617	7.54295	46	15	61	0.754098	38	40	78	0.487179	50.3913	0.646042
34	RFP	85	Anc	M	3	5750000	700000	0.121739	0.0965463	0.164649	400	74	474	0.843882	109	96	205	0.531707	129.165	0.630073	58	124	69	132	253	73	9	718	5.81894	46	15	61	0.754098	26	43	69	0.376812	34.4783	0.499685
34	RFP	105	Anc	M	3	6000000	562500	0.09375	0.100265	0.0848455	400	74	474	0.843882	77	81	158	0.487342	91.245	0.5775	4	67	57	39	49	68	87	371	7.30997	46	15	61	0.754098	68	78	146	0.465753	90.1739	0.61763
63	RFP	85	Anc	M	3	4300000	312500	0.0726744	0.0800142	0.065329	376	55	431	0.87239	96	124	220	0.436364	110.043	0.500193	37	66	19	37	76	74	74	383	6.96084	129	36	165	0.781818	31	41	72	0.430556	39.6512	0.550711
63	RFP	105	Anc	M	3	5400000	337500	0.0625	0.0527108	0.0734969	376	55	431	0.87239	72	84	156	0.461538	82.5319	0.529051	48	89	70	67	82	47	42	445	5.59551	129	36	165	0.781818	30	56	86	0.348837	38.3721	0.446187
85	RFP	105	Anc	M	3	8600000	925000	0.107558	0.0871293	0.144621	307	107	414	0.741546	98	107	205	0.478049	132.156	0.644665	23	72	75	141	61	84	3	459	5.78214	30	17	47	0.638298	23	46	69	0.333333	36.0333	0.522222
28	RFP	34	Anc	NM	4	6200000	3525000	0.568548	0.441445	0.695857	263	4	267	0.985019	139	143	282	0.492908	141.114	0.500404	150							150	0	86	5	91	0.945055	47	81	128	0.367188	49.7326	0.388536
28	RFP	63	Anc	NM	4	6300000	2150000	0.34127	0.293	0.383449	263	4	267	0.985019	226	266	492	0.45935	229.437	0.466336	92							92	0	86	5	91	0.945055	28	46	74	0.378378	29.6279	0.400377
28	RFP	85	Anc	NM	4	6200000	2775000	0.447581	0.723225	0.218976	263	4	267	0.985019	117	145	262	0.446565	118.779	0.453357	236							236	0	86	5	91	0.945055	63	28	91	0.692308	66.6628	0.732558
28	RFP	105	Anc	NM	4	6300000	4.525e+06	0.718254	0.633411	0.788598	263	4	267	0.985019	242	300	542	0.446494	245.681	0.453285	232							232	0	86	5	91	0.945055	51	84	135	0.377778	53.9651	0.399742
34	RFP	63	Anc	NM	4	7550000	2400000	0.317881	0.378959	0.261923	240	120	360	0.666667	102	218	320	0.31875	153	0.478125	177							177	0	26	21	47	0.553191	35	76	111	0.315315	63.2692	0.569993
34	RFP	85	Anc	NM	4	5550000	1850000	0.333333	0.687998	-0.00530149	240	120	360	0.666667	169	350	519	0.325626	253.5	0.488439	186							186	0	26	21	47	0.553191	116	92	208	0.557692	209.692	1.00814
34	RFP	105	Anc	NM	4	6350000	2150000	0.338583	0.377958	0.308972	240	120	360	0.666667	93	232	325	0.286154	139.5	0.429231	162							162	0	26	21	47	0.553191	44	122	166	0.26506	79.5385	0.479147
63	RFP	85	Anc	NM	4	5900000	2.425e+06	0.411017	0.558425	0.199922	228	45	273	0.835165	209	216	425	0.491765	250.25	0.588824	165							165	0	33	11	44	0.75	66	44	110	0.6	88	0.8
63	RFP	105	Anc	NM	4	6600000	3725000	0.564394	0.348485	0.881097	228	45	273	0.835165	366	371	737	0.496608	438.237	0.594623	197							197	0	33	11	44	0.75	38	100	138	0.275362	50.6667	0.36715
85	RFP	105	Anc	NM	4	4000000	3200000	0.8	0.768483	0.815155	194	123	317	0.611987	62	250	312	0.198718	101.309	0.324709	350							350	0	22	23	45	0.488889	52	289	341	0.152493	106.364	0.311917
28	RFP	34	Anc	M	4	6200000	1.1625e+06	0.1875	0.142794	0.232279	263	4	267	0.985019	139	143	282	0.492908	141.114	0.500404	16	33	53	52	146	106		406	6.94089	125	6	131	0.954198	20	35	55	0.363636	20.96	0.381091
28	RFP	63	Anc	M	4	6300000	1337500	0.212302	0.176905	0.243233	263	4	267	0.985019	226	266	492	0.45935	229.437	0.466336	25	76						101	1.50495	125	6	131	0.954198	33	56	89	0.370787	34.584	0.388584
28	RFP	85	Anc	M	4	6200000	362500	0.0584677	0.103967	0.0207334	263	4	267	0.985019	117	145	262	0.446565	118.779	0.453357	18	106	147	208	112			591	4.98139	125	6	131	0.954198	30	9	39	0.769231	31.44	0.806154
28	RFP	105	Anc	M	4	6300000	1650000	0.261905	0.232118	0.286601	263	4	267	0.985019	242	300	542	0.446494	245.681	0.453285	64	134	60	98	95	93	37	581	5.55938	125	6	131	0.954198	46	74	120	0.383333	48.208	0.401733
34	RFP	63	Anc	M	4	7550000	562500	0.0745033	0.0944785	0.0562027	240	120	360	0.666667	102	218	320	0.31875	153	0.478125	3	64	59	4				130	2.98462	19	17	36	0.527778	8	17	25	0.32	15.1579	0.606316
34	RFP	85	Anc	M	4	5550000	262500	0.0472973	0.0489264	0.0457418	240	120	360	0.666667	169	350	519	0.325626	253.5	0.488439	36	47	57	59	67	70	22	358	6.07821	19	17	36	0.527778	4	11	15	0.266667	7.57895	0.505263
34	RFP	105	Anc	M	4	6350000	737500	0.116142	0.163621	0.0804361	240	120	360	0.666667	93	232	325	0.286154	139.5	0.429231	89	25	4	23	24	39	31	235	4.92766	19	17	36	0.527778	30	64	94	0.319149	56.8421	0.604703
63	RFP	85	Anc	M	4	5900000	937500	0.158898	0.197963	0.102956	228	45	273	0.835165	209	216	425	0.491765	250.25	0.588824	70	80	42	67	130	135	2	526	5.97719	25	11	36	0.694444	27	26	53	0.509434	38.88	0.733585
63	RFP	105	Anc	M	4	6600000	1000000	0.151515	0.0723514	0.267635	228	45	273	0.835165	366	371	737	0.496608	438.237	0.594623	43	60	44	37	55	61	56	356	6.29213	25	11	36	0.694444	14	57	71	0.197183	20.16	0.283944
85	RFP	105	Anc	M	4	4000000	662500	0.165625	0.147778	0.174207	194	123	317	0.611987	62	250	312	0.198718	101.309	0.324709	68	56	39	33	12	15	37	260	4.44615	17	14	31	0.548387	17	90	107	0.158879	31	0.28972
28	RFP	34	Anc	NM	5	8100000	1.1e+06	0.135802	0.0801762	0.191527	160	6	166	0.963855	82	88	170	0.482353	85.075	0.500441	121							121	0	19	0	19	1	13	31	44	0.295455	13	0.295455
28	RFP	63	Anc	NM	5	8000000	1700000	0.2125	0.170683	0.264303	160	6	166	0.963855	120	105	225	0.533333	124.5	0.553333	242							242	0	19	0	19	1	20	25	45	0.444444	20	0.444444
28	RFP	85	Anc	NM	5	6400000	2.175e+06	0.339844	0.276158	0.398688	160	6	166	0.963855	106	123	229	0.462882	109.975	0.48024	393							393	0	19	0	19	1	16	25	41	0.390244	16	0.390244
28	RFP	105	Anc	NM	5	6850000	1475000	0.215328	0.109361	0.368257	160	6	166	0.963855	78	59	137	0.569343	80.925	0.590693	420	11						431	0.0510441	19	0	19	1	18	42	60	0.3	18	0.3
34	RFP	63	Anc	NM	5	7800000	900000	0.115385	0.147709	0.0947557	150	74	224	0.669643	72	204	276	0.26087	107.52	0.389565	239	19						258	0.147287	25	15	40	0.625	24	53	77	0.311688	38.4	0.498701
34	RFP	85	Anc	NM	5	8250000	5550000	0.672727	0.646985	0.702472	150	74	224	0.669643	56	100	156	0.358974	83.6267	0.536068	360	22						382	0.115183	25	15	40	0.625	29	61	90	0.322222	46.4	0.515556
34	RFP	105	Anc	NM	5	6600000	1900000	0.287879	0.197951	0.384169	150	74	224	0.669643	125	236	361	0.34626	186.667	0.517082	290	38						328	0.231707	25	15	40	0.625	14	49	63	0.222222	22.4	0.355556
63	RFP	85	Anc	NM	5	7800000	1300000	0.166667	0.1628	0.171252	138	26	164	0.841463	84	100	184	0.456522	99.8261	0.542533	383	23						406	0.1133	32	5	37	0.864865	33	39	72	0.458333	38.1562	0.529948
63	RFP	105	Anc	NM	5	8400000	1600000	0.190476	0.104937	0.301603	138	26	164	0.841463	126	139	265	0.475472	149.739	0.565053	237	11						248	0.0887097	32	5	37	0.864865	21	57	78	0.269231	24.2812	0.311298
85	RFP	105	Anc	NM	5	5700000	3100000	0.54386	0.348564	0.796448	105	46	151	0.695364	80	124	204	0.392157	115.048	0.563959	343							343	0	15	10	25	0.6	18	65	83	0.216867	30	0.361446
28	RFP	34	Anc	M	5	8100000	1.06875e+06	0.131944	0.0596958	0.204321	160	6	166	0.963855	82	88	170	0.482353	85.075	0.500441	152	142	41	2				337	1.36499	24	0	24	1	12	41	53	0.226415	12	0.226415
28	RFP	63	Anc	M	5	8000000	862500	0.107813	0.0835037	0.137926	160	6	166	0.963855	120	105	225	0.533333	124.5	0.553333	122	91	37	7				257	1.44747	24	0	24	1	33	44	77	0.428571	33	0.428571
28	RFP	85	Anc	M	5	6400000	650000	0.101562	0.0837119	0.118056	160	6	166	0.963855	106	123	229	0.462882	109.975	0.48024	115	115	60	64	69	16		439	3.5672	24	0	24	1	19	29	48	0.395833	19	0.395833
28	RFP	105	Anc	M	5	6850000	831250	0.12135	0.0940136	0.160802	160	6	166	0.963855	78	59	137	0.569343	80.925	0.590693	71	110	85	80	60	6		412	3.83495	24	0	24	1	27	32	59	0.457627	27	0.457627
34	RFP	63	Anc	M	5	7800000	325000	0.0416667	0.0766004	0.0193728	150	74	224	0.669643	72	204	276	0.26087	107.52	0.389565	51	87	51	114	56			359	4.20613	13	17	30	0.433333	9	20	29	0.310345	20.7692	0.71618
34	RFP	85	Anc	M	5	8250000	1393750	0.168939	0.332813	-0.020415	150	74	224	0.669643	56	100	156	0.358974	83.6267	0.536068	93	148	77	170	81	56	8	633	4.62559	13	17	30	0.433333	27	32	59	0.457627	62.3077	1.05606
34	RFP	105	Anc	M	5	6600000	818750	0.124053	0.235296	0.00494004	150	74	224	0.669643	125	236	361	0.34626	186.667	0.517082	9	32	12	51	145	106	2	357	7.45658	13	17	30	0.433333	17	23	40	0.425	39.2308	0.980769
63	RFP	85	Anc	M	5	7800000	606250	0.0777244	0.112362	0.0366454	138	26	164	0.841463	84	100	184	0.456522	99.8261	0.542533	131	162	107	101	89	45	12	647	4.11747	21	9	30	0.7	28	23	51	0.54902	40	0.784314
63	RFP	105	Anc	M	5	8400000	406250	0.0483631	0.0240177	0.079991	138	26	164	0.841463	126	139	265	0.475472	149.739	0.565053	41	59	50	81	90	65	17	403	5.90074	21	9	30	0.7	11	45	56	0.196429	15.7143	0.280612
85	RFP	105	Anc	M	5	5700000	1156250	0.202851	0.152478	0.268002	105	46	151	0.695364	80	124	204	0.392157	115.048	0.563959	125	157	209	85	77	17		670	3.65075	23	16	39	0.589744	25	75	100	0.25	42.3913	0.423913

## Sheet: Morph-clonal
image #	stalk length	st. top	st.midd	st.bott	sorus width	sorus length	ave.stalk	ave.sorus	pixels	um	st leng (um)	st.with (um)	sor. width (um)	stalk vol(um3)	sorus vol (um3)	sorus:stalk	sorus/(sorus+stalk)		mean	sd	se
28 - migrate
1	966.4	38.6	13	7.8	208.9	236	19.8	222.45	380	200	508.632	10.4211	117.079	43382.7	840301	19.3695	0.950907	sorus vol	14.8301	8.04785	2.84535
2	371.1	27	9.1	6.6	92.7	111.5	14.2333	102.1	380	200	195.316	7.49123	53.7368	8608.61	81248.4	9.43804	0.904197	stalk length	0.911906	0.0678545	0.0239902
3	456	10	20.1	50	202.7	225.4	26.7	214.05	380	200	240	14.0526	112.658	37223.4	748658	20.1125	0.952635
4	535.6	21.1	11.7	7.1	71.3	80.7	13.3	76	380	200	281.895	7	40	10848.6	33510.3	3.08891	0.755436
5	890	36.6	21.9	16.4	174.2	209	24.9667	191.6	380	200	468.421	13.1404	100.842	63524.3	536938	8.45248	0.894208
6	280	18	9.7	7.1	114.9	120	11.6	117.45	380	200	147.368	6.10526	61.8158	4314.23	123679	28.6678	0.966293
7	566.8	55.2	13.4	11.3	186.4	211.5	26.6333	198.95	380	200	298.316	14.0175	104.711	46037.3	601132	13.0575	0.928864
8	500.2	12	17	45.4	179.3	213.8	24.8	196.55	380	200	263.263	13.0526	103.447	35227	579638	16.4544	0.942708
28 - non- migrate
1	764.1	19.7	9.3	4.3	90.7	90.5	11.1	90.6	339.4	500	1125.66	16.3524	133.471	236407	1.24497e+06	5.2662	0.840414	sorus vol	2.35283	1.64626	0.58204
2	896.9	20.4	8.5	3.4	48.1	51.8	10.7667	49.95	339.4	500	1321.3	15.8613	73.5857	261078	208631	0.799114	0.444171	stalk length	0.641204	0.149532	0.0528676
3	791	17.3	7.9	3.6	57.1	58.8	9.6	57.95	339.4	500	1165.29	14.1426	85.3712	183056	325787	1.77971	0.640251
4	944	27.6	13.1	4.1	69.3	66.5	14.9333	67.9	339.4	500	1390.69	21.9996	100.029	528628	524062	0.991363	0.497831
5	746.7	14.6	5.2	4.4	64	72.3	8.06667	68.15	339.4	500	1100.03	11.8837	100.398	122011	529872	4.34282	0.812833
6	792.5	17	7.4	3.8	59.4	68.7	9.4	64.05	339.4	500	1167.5	13.848	94.3577	175841	439876	2.50156	0.714413
7	861.5	14	10.7	4.1	61.3	65.8	9.6	63.55	339.4	500	1269.15	14.1426	93.6211	199371	429655	2.15505	0.683048
8	893.9	24.4	11.1	5.3	55.7	69.4	13.6	62.55	339.4	500	1316.88	20.0354	92.1479	415175	409690	0.986788	0.496675
34 - migrate
1	419.5	38.8	16.7	10.1	200.3	200.3	21.8667	200.3	312.6	200	268.394	13.9902	128.151	41258.2	1.10196e+06	26.7088	0.96391	sorus vol	29.4971	10.0859	3.56589
2	486.1	10.3	13.2	37.8	230.6	251.3	20.4333	240.95	312.6	200	311.004	13.0731	154.159	41746.2	1.91824e+06	45.95	0.978701	stalk length	0.962943	0.0162579	0.00574802
3	321.8	9	9.8	37.5	176.8	198.1	18.7667	187.45	312.6	200	205.886	12.0068	119.93	23311.7	903188	38.744	0.974839
4	513.9	41.2	20.2	13.5	222.2	253.3	24.9667	237.75	312.6	200	328.791	15.9736	152.111	65889	1.84282e+06	27.9686	0.96548
5	527.3	13	17.9	34.4	203.2	219.5	21.7667	211.35	312.6	200	337.364	13.9262	135.221	51387.2	1.29458e+06	25.1927	0.961821
6	553.5	39.4	31.3	8.9	231.2	258.7	26.5333	244.95	312.6	200	354.127	16.9759	156.718	80152	2.01537e+06	25.1443	0.961751
7	638.6	69.3	26.9	18	248.9	268.5	38.0667	258.7	312.6	200	408.573	24.3549	165.515	190341	2.37417e+06	12.4732	0.925779
8	794.4	34.6	13.4	15	242.7	279.1	21	260.9	312.6	200	508.253	13.4357	166.923	72059.4	2.43525e+06	33.7951	0.97126
34 - non- migrate
1	871.2	28.4	11.9	9.2	146	152.6	16.5	149.3	340.3	500	1280.05	24.2433	219.365	590881	5.52716e+06	9.35411	0.90342	sorus vol	12.6426	6.63925	2.34733
2	701.6	21.4	7.4	6.8	127.5	148.4	11.8667	137.95	340.3	500	1030.86	17.4356	202.689	246128	4.36001e+06	17.7144	0.946565	stalk length	0.903491	0.0591022	0.0208958
3	619.8	19.7	13.3	5.4	152.3	145.8	12.8	149.05	340.3	500	910.667	18.8069	218.998	252980	5.49944e+06	21.7387	0.956022
4	1081.3	25.8	20.3	12.5	212.5	240.8	19.5333	226.65	340.3	500	1588.75	28.7002	333.015	1.02781e+06	1.9337e+07	18.8138	0.94953
5	502.7	17.4	9.3	5.7	75.2	79.1	10.8	77.15	340.3	500	738.613	15.8684	113.356	146073	762659	5.22108	0.839256
6	772.3	26.7	14.1	5	132	139.4	15.2667	135.7	340.3	500	1134.73	22.4312	199.383	448424	4.15014e+06	9.25494	0.902486
7	854.8	22.8	12	8.1	148	169.3	14.3	158.65	340.3	500	1255.95	21.0109	233.103	435462	6.63198e+06	15.2297	0.938385
8	602.6	22.6	12.4	9.1	164	17.3	14.7	90.65	340.3	500	885.395	21.5986	133.191	324398	1.23716e+06	3.81372	0.79226
85 - migrate
1	834.4	43.5	20.9	12.9	276.3	291.8	25.7667	284.05	384.2	200	434.357	13.4132	147.866	61376	1.69278e+06	27.5805	0.965011	sorus vol	45.1402	33.8485	11.9672
2	696.7	36.6	20	13.4	319.8	367.2	23.3333	343.5	384.2	200	362.676	12.1465	178.813	42024.9	2.99362e+06	71.2344	0.986156	stalk length	0.970954	0.0122863	0.00434387
3	562.7	42.9	21.7	17.3	282	311.2	27.3	296.6	384.2	200	292.92	14.2113	154.399	46463.3	1.92721e+06	41.4782	0.976459
4	724.4	72	33.2	26	347.6	391.2	43.7333	369.4	384.2	200	377.095	22.7659	192.296	153501	3.72312e+06	24.2547	0.960403
5	472.8	39.7	14.6	12.6	212.3	214.8	22.3	213.55	384.2	200	246.122	11.6085	111.166	26049.2	719309	27.6134	0.965051
6	721.6	32.1	12.2	8.6	193	218.6	17.6333	205.8	384.2	200	375.638	9.17925	107.132	24858.4	643802	25.8988	0.962824
7	44.8	49.4	18.8	12	174.8	182.8	26.7333	178.8	384.2	200	23.3212	13.9164	93.0765	3547.25	422201	119.022	0.991668
8	387.6	28.9	33.1	55.4	260.3	295	39.1333	277.65	384.2	200	201.77	20.3713	144.534	65763.5	1.58092e+06	24.0394	0.960063
85 - non- migrate
1	857	26	15.2	9.2	162.1	162.4	16.8	162.25	425	500	1008.24	19.7647	190.882	309337	3.64163e+06	11.7724	0.921706	sorus vol	17.9187	12.1778	4.30549
2	856.4	26.2	13.9	9.3	175.2	177.1	16.4667	176.15	425	500	1007.53	19.3725	207.235	296976	4.66004e+06	15.6917	0.94009	stalk length	0.909163	0.0941071	0.0332719
3	743.6	14.9	9.5	6.8	161.7	175.9	10.4	168.8	425	500	874.824	12.2353	198.588	102858	4.10071e+06	39.8676	0.975531
4	822.2	26.1	13.2	6.5	126.3	139	15.2667	132.65	425	500	967.294	17.9608	156.059	245075	1.99005e+06	8.12016	0.890353
5	604.1	19.8	12.2	8	127.5	151.5	13.3333	139.5	425	500	710.706	15.6863	164.118	137347	2.31454e+06	16.8518	0.943983
6	330.6	11.5	6.4	5	76.3	84.4	7.63333	80.35	425	500	388.941	8.98039	94.5294	24635.7	442282	17.9529	0.947238
7	586.4	20.6	10.8	4.9	65.7	65.3	12.1	65.5	425	500	689.882	14.2353	77.0588	109799	239588	2.18207	0.685739
8	706	8.9	9.5	15.9	152.4	172.3	11.4333	162.35	425	500	830.588	13.451	191	118028	3.64837e+06	30.9112	0.968663
105 - migrate
1	1173.6	29.6	10.7	10.4	270.6	287.7	16.9	279.15	1356.3	500	432.648	6.23019	102.909	13189.4	570630	43.2641	0.977408	sorus vol	7.50749	15.7936	5.5839
2	1070.6	34.2	15	6.4	112.7	124.9	18.5333	118.8	1356.3	500	394.677	6.83231	43.7956	14469.9	43983.6	3.03965	0.752454	stalk length	0.617838	0.212682	0.0751944
3	831.1	29.8	12.9	6.3	58.8	71.8	16.3333	65.3	1356.3	500	306.385	6.02128	24.0728	8724.4	7304.34	0.837231	0.455703
4	1632.1	39.3	13	7.2	83.7	102.1	19.8333	92.9	1356.3	500	601.674	7.31156	34.2476	25262.2	21032.4	0.832564	0.454317
5	1522.1	53.1	12.7	8.7	147.6	155.1	24.8333	151.35	1356.3	500	561.122	9.15481	55.7952	36935.7	90947.1	2.46231	0.711176
6	1099.8	36	12	6.2	59.5	76.5	18.0667	68	1356.3	500	405.441	6.66028	25.0682	14125.5	8248.37	0.583937	0.368662
7	1376.4	46.9	12.3	6.7	108.7	121.6	21.9667	115.15	1356.3	500	507.41	8.09801	42.45	26134	40052.8	1.5326	0.605148
105 - non- migrate
1	1382.1	35.5	6.8	13.6	158.1	173.2	18.6333	165.65	531.9	500	1299.21	17.5158	155.715	313062	1.97694e+06	6.31484	0.863292	sorus vol	3.35788	1.76202	0.622969
2	1333.9	36.9	13.6	5.7	109.9	117.1	18.7333	113.5	531.9	500	1253.9	17.6098	106.693	305396	635926	2.0823	0.675567	stalk length	0.742805	0.0801204	0.0283268
3	1530	36	18.1	10	131.3	156.3	21.3667	143.8	531.9	500	1438.24	20.0852	135.176	455696	1.29329e+06	2.83805	0.739451
4	1340.2	33.3	17	6.4	115.8	123	18.9	119.4	531.9	500	1259.82	17.7665	112.239	312322	740341	2.37044	0.703303
5	1272.5	37.9	15.5	8.7	106.6	124.5	20.7	115.55	531.9	500	1196.18	19.4585	108.62	355720	671009	1.88634	0.653541
6	1559.2	45.6	20.7	8	139.3	153.7	24.7667	146.5	531.9	500	1465.69	23.2813	137.714	623946	1.36751e+06	2.19172	0.686689
7	1495.2	34	16.6	7.5	157	184.6	19.3667	170.8	531.9	500	1405.53	18.2052	160.556	365863	2.16712e+06	5.92329	0.85556
8	1536.1	40.5	19.1	10.3	146.4	173	23.3	159.7	531.9	500	1443.97	21.9026	150.122	544053	1.77147e+06	3.25606	0.765041

## Sheet: Morph-chimera
image #	stalk length	st. top	st.midd	st.bott	sorus width	sorus length	ave.stalk	ave.sorus	pixels	um	st leng (um)	st.with (um)	sor. width (um)	stalk vol(um3)	sorus vol (um3)	sorus:stalk	sorus/(sorus+stalk)		mean	sd	se
28x34 - NM
1	632.2	12.7	9.1	4.3	86	89	8.7	87.5	202.2	500	1563.3	21.5134	216.37	568263	5.30383e+06	9.3334	0.903226	sorus vol ratio	10.9462	4.36464	1.54313
2	688.2	12.2	8	5.8	73.6	85.8	8.66667	79.7	202.2	500	1701.78	21.4309	197.082	613868	4.00811e+06	6.52927	0.867185	sor(sor+stal)	0.905555	0.034857	0.0123238
3	343.1	9	6	3.7	62.9	63.8	6.23333	63.35	202.2	500	848.417	15.4138	156.652	158313	2.01282e+06	12.7141	0.927083
4	392.1	12.5	7.5	3.4	76.5	78.5	7.8	77.5	202.2	500	969.585	19.2878	191.642	283297	3.68528e+06	13.0085	0.928615
5	647.7	14.7	9.7	4.5	77.7	83.3	9.63333	80.5	202.2	500	1601.63	23.8213	199.06	713811	4.13003e+06	5.78588	0.852635
6	587.6	16	8.1	8.5	120	127.5	10.8667	123.75	202.2	500	1453.02	26.8711	306.009	824007	1.50038e+07	18.2083	0.947939
7	422.2	11.1	7.3	4.3	81	80.4	7.56667	80.7	202.2	500	1044.02	18.7108	199.555	287067	4.16089e+06	14.4945	0.935461
8	643.8	12.3	8.7	4.8	79.6	82.8	8.6	81.2	202.2	500	1591.99	21.2661	200.791	565463	4.23871e+06	7.49599	0.882297
28x63 - NM
1	413.6	10.5	5.1	3.6	82.3	92	6.4	87.15	202.2	500	1022.75	15.8259	215.504	201186	5.24044e+06	26.0478	0.963028	sorus vol ratio	26.2434	10.4754	3.70363
2	388.6	12.7	6.3	4.3	76.8	81.1	7.76667	78.95	202.2	500	960.93	19.2054	195.227	278374	3.89602e+06	13.9956	0.933314	sor(sor+stal)	0.956338	0.0218492	0.00772485
3	344.2	6.7	4.3	3.1	70.2	77.5	4.7	73.85	202.2	500	851.137	11.6222	182.616	90294.9	3.18872e+06	35.3145	0.972463
4	237.7	8.8	5.3	3.9	69.1	75.6	6	72.35	202.2	500	587.784	14.8368	178.907	101622	2.99834e+06	29.5048	0.967218
5	373.6	8.5	5.5	3.6	89.8	94.2	5.86667	92	202.2	500	923.838	14.5071	227.498	152702	6.16494e+06	40.3722	0.975829
6	259.5	9.9	6.4	5	73.1	75	7.1	74.05	202.2	500	641.691	17.5569	183.111	155350	3.2147e+06	20.6933	0.953903
7	340.8	11.4	5.6	3.3	61.9	63.9	6.76667	62.9	202.2	500	842.73	16.7326	155.539	185313	1.97023e+06	10.6319	0.91403
8	365.6	7.9	6.4	3.8	84.4	90.3	6.03333	87.35	202.2	500	904.055	14.9192	215.999	158044	5.2766e+06	33.3869	0.970919
28x85 - NM
1	260.6	6.7	3.9	4	59.4	67.7	4.86667	63.55	202.2	500	644.411	12.0343	157.146	73298.3	2.03194e+06	27.7216	0.965183	sorus vol ratio	13.8752	14.4172	5.09724
2	572.9	12.1	7	3.2	42.8	45.7	7.43333	44.25	202.2	500	1416.67	18.3811	109.421	375926	685970	1.82475	0.645986	sor(sor+stal)	0.809336	0.195699	0.06919
3	640	10.2	6.9	2.5	30.5	32.1	6.53333	31.3	202.2	500	1582.59	16.1556	77.3986	324419	242772	0.748328	0.428025
4	222.5	11.8	7	4.5	85.9	102	7.76667	93.95	202.2	500	550.198	19.2054	232.319	159388	6.56531e+06	41.1908	0.976298
5	643.6	15	10.5	6.5	82.5	95.2	10.6667	88.85	202.2	500	1591.49	26.3765	219.708	869621	5.55313e+06	6.38569	0.864603
6	386.3	15.1	4.8	3	41.4	47.2	7.63333	44.3	202.2	500	955.242	18.8757	109.545	267307	688298	2.57494	0.720275
7	335.1	9.5	5.3	3.8	66.9	73	6.2	69.95	202.2	500	828.635	15.3314	172.972	152973	2.70974e+06	17.7139	0.946564
8	401	10.1	6	9.2	79.1	84.7	8.43333	81.9	202.2	500	991.592	20.8539	202.522	338688	4.34928e+06	12.8416	0.927754
28x105 - NM
1	291.5	6	5.2	4	66.1	74.7	5.06667	70.4	202.2	500	720.821	12.5288	174.085	88866.8	2.76238e+06	31.0845	0.968832	sorus vol ratio	13.233	9.82585	3.47396
2	425.3	9.1	10.1	11.2	103.8	120.2	10.1333	112	202.2	500	1051.68	25.0577	276.954	518629	1.11229e+07	21.4468	0.95545	sor(sor+stal)	0.893395	0.0673354	0.0238066
3	558.5	12.3	8.7	6.1	99.6	120.6	9.03333	110.1	202.2	500	1381.06	22.3376	272.255	541222	1.05664e+07	19.5232	0.951275
4	353	9.8	7.1	3.3	57.8	72.5	6.73333	65.15	202.2	500	872.898	16.6502	161.103	190060	2.18932e+06	11.5191	0.920122
5	542.4	12.8	7.2	4	55.9	59.6	8	57.75	202.2	500	1341.25	19.7824	142.804	412246	1.52483e+06	3.69884	0.787181
6	475	13.5	8.3	2.4	58	66.2	8.06667	62.1	202.2	500	1174.58	19.9472	153.561	367061	1.89601e+06	5.16537	0.837804
7	476.7	11	7.7	5.4	56.7	65.6	8.03333	61.15	202.2	500	1178.78	19.8648	151.212	365337	1.81032e+06	4.9552	0.83208
8	238	18.1	4.5	4	60.3	63.6	8.86667	61.95	202.2	500	588.526	21.9255	153.19	222205	1.8823e+06	8.47101	0.894415
34x63 - NM
1	350.5	14.6	4.2	2.4	42	49.4	7.06667	45.7	202.2	500	866.716	17.4744	113.007	207861	755638	3.6353	0.784264	sorus vol ratio	8.08381	6.29801	2.22668
2	304.7	6.5	4.9	2.7	41.4	46.7	4.7	44.05	202.2	500	753.462	11.6222	108.927	79932.7	676711	8.466	0.894359	sor(sor+stal)	0.83288	0.105196	0.0371924
3	364.3	14	4.2	2.7	37.4	37.9	6.96667	37.65	202.2	500	900.841	17.2272	93.1009	209974	422533	2.01231	0.668029
4	342.5	10.3	4	3.1	66.1	69.2	5.8	67.65	202.2	500	846.934	14.3422	167.285	136827	2.45114e+06	17.9141	0.947129
5	368.4	11	6.5	2.5	45	49.2	6.66667	47.1	202.2	500	910.979	16.4853	116.469	194444	827233	4.25436	0.809682
6	330.6	12.1	4.2	3	35.4	39.1	6.43333	37.25	202.2	500	817.507	15.9083	92.1118	162492	409208	2.51833	0.715774
7	348.4	9.5	7	3	70.5	73.5	6.5	72	202.2	500	861.523	16.0732	178.042	174808	2.95504e+06	16.9045	0.944148
8	384.3	9	6.3	3.3	53.9	62.8	6.2	58.35	202.2	500	950.297	15.3314	144.288	175433	1.57285e+06	8.96556	0.899654
34x85 - NM
1	486.4	9.8	6.3	2.2	36.1	41	6.1	38.55	202.2	500	1202.77	15.0841	95.3264	214936	453564	2.11022	0.67848	sorus vol ratio	11.9083	12.3258	4.35784
2	522.3	11.8	7.4	3.2	33.2	38.3	7.46667	35.75	202.2	500	1291.54	18.4636	88.4026	345804	361737	1.04608	0.51126	sor(sor+stal)	0.76374	0.212748	0.0752179
3	489.9	10	7.7	3.5	87.8	100.8	7.06667	94.3	202.2	500	1211.42	17.4744	233.185	290531	6.63896e+06	22.8511	0.958073
4	462.8	12.1	8.3	3.1	38.4	45.3	7.83333	41.85	202.2	500	1144.41	19.3703	103.487	337243	580299	1.72071	0.632449
5	527.8	11.9	8	6.6	96.7	117.4	8.83333	107.05	202.2	500	1305.14	21.8431	264.713	489075	9.71237e+06	19.8587	0.952058
6	480	12.5	4.5	3	91.2	112.1	6.66667	101.65	202.2	500	1186.94	16.4853	251.36	253347	8.31548e+06	32.8225	0.970434
7	543.6	10.8	8.2	3	80.3	89.5	7.33333	84.9	202.2	500	1344.21	18.1339	209.941	347167	4.84494e+06	13.9556	0.933136
8	488.3	11.2	8	4	31.5	36.6	7.73333	34.05	202.2	500	1207.47	19.123	84.1988	346798	312548	0.901239	0.474027
34x105 - NM
1	435.9	11.5	7.1	3.5	70.2	76.6	7.36667	73.4	202.2	500	1077.89	18.2163	181.503	280922	3.13079e+06	11.1447	0.917659	sorus vol ratio	8.61646	4.06131	1.43589
2	512.8	12.1	7.8	4.1	74.3	85.5	8	79.9	202.2	500	1268.05	19.7824	197.577	389748	4.03836e+06	10.3615	0.911983	sor(sor+stal)	0.881195	0.0425647	0.0150489
3	363.7	15.6	5.8	3	55.7	60.9	8.13333	58.3	202.2	500	899.357	20.1121	144.164	285718	1.56881e+06	5.49078	0.845935
4	390.8	10.7	5	3.5	53.7	55.2	6.4	54.45	202.2	500	966.37	15.8259	134.644	190095	1.27808e+06	6.72338	0.870523
5	496.1	8.7	6.5	3.3	47.1	55.6	6.16667	51.35	202.2	500	1226.76	15.2489	126.978	224041	1.07198e+06	4.78476	0.827132
6	352.5	10.7	5.5	3.9	70.7	74	6.7	72.35	202.2	500	871.662	16.5678	178.907	187917	2.99834e+06	15.9557	0.941023
7	346.4	6.5	3.7	1.5	34	37.8	3.9	35.9	202.2	500	856.578	9.64392	88.7735	62569.6	366310	5.85444	0.854109
63x85 - NM
1	342.2	7.6	4.7	3	48.4	50.9	5.1	49.65	202.2	500	846.192	12.6113	122.774	105700	968998	9.1674	0.901646	sorus vol ratio	9.25901	6.54383	2.31359
2	219.7	10	4.3	2.8	52.6	55	5.7	53.8	202.2	500	543.274	14.095	133.037	84768.8	1.23286e+06	14.5437	0.935665	sor(sor+stal)	0.810791	0.205815	0.0727666
3	310.8	7.8	4.8	3.4	59.8	70.1	5.33333	64.95	202.2	500	768.546	13.1883	160.608	104987	2.16922e+06	20.6618	0.953836
4	459.8	9.8	5.1	2.7	52	56.1	5.86667	54.05	202.2	500	1136.99	14.5071	133.655	187935	1.25012e+06	6.65187	0.869313
5	372	8.4	5	2.7	53.8	58.5	5.36667	56.15	202.2	500	919.881	13.2707	138.848	127236	1.40157e+06	11.0155	0.916774
6	417.4	12.2	4.9	2.7	34.8	37.8	6.6	36.3	202.2	500	1032.15	16.3205	89.7626	215922	378691	1.75383	0.63687
7	451.4	12.3	7.3	3.2	23.2	33.3	7.6	28.25	202.2	500	1116.22	18.7933	69.8566	309632	178493	0.576468	0.365671
8	432.5	11.5	5	3.5	61	69.8	6.66667	65.4	202.2	500	1069.49	16.4853	161.721	228276	2.21462e+06	9.70149	0.906555
63x105 - NM
1	376.1	9.7	4.7	3.5	53.2	54.7	5.96667	53.95	202.2	500	930.02	14.7544	133.408	159010	1.2432e+06	7.81837	0.8866	sorus vol ratio	6.14188	3.26331	1.15375
2	334.4	10.9	4.6	3.6	59.1	65.9	6.36667	62.5	202.2	500	826.904	15.7435	154.55	160971	1.93288e+06	12.0077	0.923122	sor(sor+stal)	0.819333	0.119683	0.0423142
3	353.3	11.8	6.5	3.2	51.4	56.8	7.16667	54.1	202.2	500	873.64	17.7217	133.778	215494	1.25359e+06	5.81731	0.853315
4	359.1	12.1	6.6	4.6	57.1	63.7	7.76667	60.4	202.2	500	887.982	19.2054	149.357	257242	1.74452e+06	6.78164	0.871492
5	355.9	12	6.5	4	57.5	64.7	7.5	61.1	202.2	500	880.069	18.546	151.088	237743	1.80588e+06	7.59595	0.883666
6	467.7	13.8	7.2	3.7	37	40.1	8.23333	38.55	202.2	500	1156.53	20.3594	95.3264	376509	453564	1.20466	0.546415
7	355.1	11.4	4.9	3.3	41	43.7	6.53333	42.35	202.2	500	878.091	16.1556	104.723	180002	601347	3.34079	0.769627
8	247	10.2	5.7	3.7	40.8	42.5	6.53333	41.65	202.2	500	610.781	16.1556	102.992	125205	572019	4.56864	0.820423
85x105 - NM
1	433	11	8.3	4.3	76.1	72.7	7.86667	74.4	202.2	500	1070.72	19.4527	183.976	318219	3.2605e+06	10.2461	0.91108	sorus vol ratio	8.67028	7.42119	2.62379
2	656.2	11	10.2	3.6	40.1	47.9	8.26667	44	202.2	500	1622.65	20.4418	108.803	532542	674409	1.2664	0.558771	sor(sor+stal)	0.816644	0.159493	0.0563894
3	319.8	9.9	4.7	4.8	76.1	82.2	6.46667	79.15	202.2	500	790.801	15.9908	195.722	158817	3.92571e+06	24.7185	0.961117
4	441.8	27.8	9.8	5.1	51.3	60.9	14.2333	56.1	202.2	500	1092.48	35.1962	138.724	1.06291e+06	1.39783e+06	1.3151	0.568053
5	393.7	15.3	9	5.5	71.8	76.3	9.93333	74.05	202.2	500	973.541	24.5631	183.111	461330	3.2147e+06	6.96833	0.874503
6	415.6	12.7	6.7	4	58.4	62.6	7.8	60.5	202.2	500	1027.7	19.2878	149.604	300276	1.7532e+06	5.83862	0.853772
7	473.1	11.6	6.7	4.5	72.3	80.9	7.6	76.6	202.2	500	1169.88	18.7933	189.416	324516	3.55837e+06	10.9652	0.916424
8	210.5	12.6	5.8	3.6	48.2	54.8	7.33333	51.5	202.2	500	520.524	18.1339	127.349	134435	1.0814e+06	8.04406	0.88943
28x34 - M
1	223.3	7.9	5	4	93	83.4	5.63333	88.2	589.4	500	189.43	4.77887	74.8219	3397.73	219323	64.5498	0.984744	sorus vol ratio	67.277	50.0081	17.6805
2	126.2	22.2	18	11.6	98.3	99.8	17.2667	99.05	589.4	500	107.058	14.6477	84.0261	18040.4	310629	17.2185	0.945111	sor(sor+stal)	0.971653	0.0237456	0.00839535
3	214.2	7.2	5.5	5.9	119.7	125.2	6.2	122.45	589.4	500	181.71	5.25959	103.877	3947.96	586887	148.656	0.993318
4	227.3	13.6	8.6	5.4	116.2	125.7	9.2	120.95	589.4	500	192.823	7.80455	102.604	9224.54	565582	61.3128	0.983952
5	236.9	12.5	7.1	5	133.1	141.7	8.2	137.4	589.4	500	200.967	6.95623	116.559	7637.69	829160	108.562	0.990873
6	152.2	24.2	19.7	21.7	116.5	124.7	21.8667	120.6	589.4	500	129.114	18.5499	102.307	34893.9	560687	16.0683	0.941412
7	256	14.1	7.2	8.1	155.2	159.1	9.8	157.15	589.4	500	217.17	8.31354	133.314	11788.6	1.24057e+06	105.235	0.990587
8	176.4	15.1	14.3	5	82.7	83.9	11.4667	83.3	589.4	500	149.644	9.72741	70.6651	11121	184762	16.6139	0.943227
28x63 - M
1	452.3	21.5	8.2	7.5	187.9	208.6	12.4	198.25	589.4	500	383.695	10.5192	168.18	33345.7	2.49068e+06	74.6927	0.986789	sorus vol ratio	76.6489	36.3172	12.8401
2	376.2	19.6	11.8	8.9	187.8	204.3	13.4333	196.05	589.4	500	319.138	11.3958	166.313	32550.4	2.40868e+06	73.9985	0.986666	sor(sor+stal)	0.964985	0.0647187	0.0228815
3	218.1	12.5	10	4.6	141.3	144.7	9.03333	143	589.4	500	185.019	7.66316	121.31	8533.38	934730	109.538	0.990953
4	292.2	23.3	15.5	9.1	173.3	183.7	15.9667	178.5	589.4	500	247.879	13.5448	151.425	35717.3	1.818e+06	50.8996	0.980732
5	246.2	9.7	6.8	6.8	140.1	135.1	7.76667	137.6	589.4	500	208.856	6.58862	116.729	7120.77	832786	116.952	0.991522
6	226.9	13.2	8.1	7.1	134.6	137.7	9.46667	136.15	589.4	500	192.484	8.03077	115.499	9749.86	806736	82.7433	0.988059
7	313	22.8	12.1	10.6	64.2	88.6	15.1667	76.4	589.4	500	265.524	12.8662	64.8117	34521.9	142547	4.12918	0.805037
8	377.3	13.8	12	13.7	200.2	228.3	13.1667	214.25	589.4	500	320.071	11.1696	181.753	31362.3	3.1437e+06	100.238	0.990122
28x85 - M
1	264.6	11.7	11	8.1	128.7	151.7	10.2667	140.2	589.4	500	224.466	8.70942	118.935	13372.7	880891	65.8725	0.985046	sorus vol ratio	44.1657	30.7561	10.8739
2	259.8	10.2	6.6	6.1	125.1	130.7	7.63333	127.9	589.4	500	220.394	6.47551	108.5	7258.34	668790	92.141	0.989264	sor(sor+stal)	0.959433	0.0342778	0.012119
3	307.6	15.7	10.4	9.6	149.5	168.8	11.9	159.15	589.4	500	260.943	10.095	135.01	20885.7	1.28854e+06	61.6948	0.98405
4	240.8	12.3	10.8	8.1	128.2	140.9	10.4	134.55	589.4	500	204.276	8.82253	114.141	12488	778627	62.35	0.984215
5	147	16.4	11.4	8.9	64	90.6	12.2333	77.3	589.4	500	124.703	10.3778	65.5752	10548.2	147644	13.9972	0.933321
6	264.2	25.7	18.4	23.3	120	123.1	22.4667	121.55	589.4	500	224.126	19.0589	103.113	63941	574041	8.97767	0.899776
7	396	11.4	6.8	7.4	73.8	90.1	8.53333	81.95	589.4	500	335.935	7.239	69.5199	13826.2	175924	12.724	0.927135
8	295	12.3	7.3	7.8	105	114	9.13333	109.5	589.4	500	250.254	7.74799	92.8911	11799.1	419682	35.5689	0.972654
28x105 - M
1	617.1	18.5	11.2	6.6	122.8	127.9	12.1	125.35	589.4	500	523.498	10.2647	106.337	43320.7	629580	14.533	0.935621	sorus vol ratio	32.0688	12.1053	4.27987
2	777.8	32.9	14.4	7.6	184.4	179	18.3	181.7	589.4	500	659.824	15.5243	154.14	124893	1.91753e+06	15.3534	0.93885	sor(sor+stal)	0.96428	0.0175109	0.00619103
3	452.8	10.4	8.1	5.2	112	123	7.9	117.5	589.4	500	384.119	6.70173	99.6776	13549.7	518551	38.2703	0.974535
4	457.3	14.4	8.9	8.1	133.9	155.4	10.4667	144.65	589.4	500	387.937	8.87909	122.71	24020.8	967461	40.276	0.975773
5	235.9	11.5	8	4.6	93.5	94.7	8.03333	94.1	589.4	500	200.119	6.81484	79.8269	7299.43	266347	36.4887	0.973325
6	442.2	16.4	10.1	7.8	149.1	163.7	11.4333	156.4	589.4	500	375.127	9.69913	132.677	27716.2	1.22289e+06	44.1219	0.977838
7	450.9	15.3	11.6	10.4	152.5	177	12.4333	164.75	589.4	500	382.508	10.5474	139.761	33421.4	1.4294e+06	42.7691	0.977153
8	337.1	12.8	6.1	4.5	85.7	96.9	7.8	91.3	589.4	500	285.969	6.6169	77.4516	9833.71	243271	24.7385	0.961148
34x63 - M
1	254.9	16.1	9	9.4	123.3	130	11.5	126.65	589.4	500	216.237	9.75568	107.44	16163.5	649372	40.1753	0.975714	sorus vol ratio	39.2409	13.4445	4.75334
2	298.3	12.3	7.2	6.3	122.4	129	8.6	125.7	589.4	500	253.054	7.29555	106.634	10578.4	634869	60.0156	0.983611	sor(sor+stal)	0.971545	0.0134466	0.00475408
3	137.3	11.4	5.7	2.8	49.2	55.7	6.63333	52.45	589.4	500	116.474	5.62719	44.4944	2896.7	46122.7	15.9225	0.940907
4	256.1	16.2	9.6	6.3	116.1	129.8	10.7	122.95	589.4	500	217.255	9.07703	104.301	14058.7	594106	42.2588	0.976883
5	304.3	11.4	4.7	4.6	96.9	108.6	6.9	102.75	589.4	500	258.144	5.85341	87.1649	6946.56	346756	49.9176	0.98036
6	340.7	16.9	6.7	4.7	105.2	120.2	9.43333	112.7	589.4	500	289.023	8.00249	95.6057	14536.9	457562	31.4759	0.969208
7	331	17.6	10	9.4	142.1	156.4	12.3333	149.25	589.4	500	280.794	10.4626	126.612	24141.2	1.06273e+06	44.0213	0.977788
8	332.9	16.1	6.7	7.2	102.1	127.1	10	114.6	589.4	500	282.406	8.4832	97.2175	15961.9	481096	30.1404	0.967887
34x85 - M
1	221.5	15.2	9	4.9	101.7		9.7	101.7	589.4	500	187.903	8.22871	86.2742	9992.79	336234	33.6476	0.971138	sorus vol ratio	42.2413	34.2902	12.1234
2	200.7	15.2	8.1	6.5	97.4		9.93333	97.4	589.4	500	170.258	8.42665	82.6264	9495.26	295362	31.1063	0.968853	sor(sor+stal)	0.968445	0.0155236	0.00548844
3	300.3	11.7	7	5.6	105.7		8.1	105.7	589.4	500	254.751	6.87139	89.6675	9447.02	377488	39.9584	0.975585
4	278.4	11.8	10.6	6.2	107.9		9.53333	107.9	589.4	500	236.172	8.08732	91.5338	12131.9	401553	33.099	0.970674
5	214	17.1	8.1	4.9	107.9		10.0333	107.9	589.4	500	181.541	8.51148	91.5338	10329.4	401553	38.8749	0.974922
6	591.8	18.5	9.1	5.3	118.3		10.9667	118.3	589.4	500	502.036	9.30325	100.356	34126.7	529215	15.5074	0.939421
7	218.7	22.2	15.3	10.6	219		16.0333	219	589.4	500	185.528	13.6014	185.782	26956.7	3.35746e+06	124.55	0.992035
8	560.3	18.6	9.7	6.3	133.3		11.5333	133.3	589.4	500	475.314	9.78396	113.081	35735.5	757127	21.187	0.954929
34x105 - M
1	522.2	16.8	8.1	4	77.6		9.63333	77.6	589.4	500	442.993	8.17215	65.8297	23235.9	149370	6.42841	0.865382	sorus vol ratio	10.6985	4.00587	1.41629
2	339.6	14.5	5.6	4.5	82		8.2	82	589.4	500	288.09	6.95623	69.5623	10948.8	176246	16.0974	0.941511	sor(sor+stal)	0.905066	0.0326754	0.0115525
3	533.9	13.2	9	5.4	78.4		9.2	78.4	589.4	500	452.918	7.80455	66.5083	21667.3	154037	7.10921	0.876683
4	526	15.5	9.3	6.5	96.8		10.4333	96.8	589.4	500	446.216	8.85081	82.1174	27453.7	289937	10.5609	0.913502
5	504.6	16	8.6	3.9	99.2		9.5	99.2	589.4	500	428.062	8.05904	84.1534	21835.5	312042	14.2906	0.9346
6	575.3	21.7	10.6	6.5	125.1		12.9333	125.1	589.4	500	488.039	10.9716	106.125	46140.8	625821	13.5633	0.931334
7	453.1	22.7	11.5	7.9	97.1		14.0333	97.1	589.4	500	384.374	11.9048	82.3719	42784.4	292642	6.83991	0.872448
8	547.5	22.1	7.4	3.2	107.9		10.9	107.9	589.4	500	464.455	9.24669	91.5338	31189.4	401553	12.8747	0.927926
63x85 - M
1	327.4	16.9	10.5	6.2	107.4	114.8	11.2	111.1	589.4	500	277.74	9.50119	94.2484	19691.7	438349	22.2606	0.957009	sorus vol ratio	21.8241	14.2752	5.04704
2	355.7	13.3	6.8	4.1	60.1	69.6	8.06667	64.85	589.4	500	301.748	6.84312	55.0136	11097.9	87178.3	7.85537	0.887074	sor(sor+stal)	0.935281	0.0430074	0.0152054
3	179.6	13	5.9	4.1	73.1	79.2	7.66667	76.15	589.4	500	152.358	6.50379	64.5996	5061.61	141152	27.8868	0.965382
4	275.4	15.5	9.3	5.2	60	67.5	10	63.75	589.4	500	233.627	8.4832	54.0804	13204.8	82816.9	6.2717	0.862481
5	343	14.9	6.1	5.2	114.6	129.3	8.73333	121.95	589.4	500	290.974	7.40866	103.453	12543.6	579727	46.2168	0.978821
6	247.1	11	10.3	6.6	97.6	112.7	9.3	105.15	589.4	500	209.62	7.88938	89.2009	10247.3	371626	36.2659	0.973166
7	438.9	15.5	10.1	6.1	103.2	113.8	10.5667	108.5	589.4	500	372.328	8.96392	92.0428	23496.9	408289	17.3763	0.945582
8	196.2	17.2	5.9	4.1	60.4	66.1	9.06667	63.25	589.4	500	166.44	7.69144	53.6563	7733.28	80883.5	10.4591	0.912733
63x105 - M
1	253.9	15.9	8.1	6.6	93.9	103.2	10.2	98.55	589.4	500	215.389	8.65287	83.602	12665.8	305948	24.1555	0.960247	sorus vol ratio	30.0867	9.47407	3.34959
2	340.5	16.4	8.1	8.3	118.8	130.1	10.9333	124.45	589.4	500	288.853	9.27497	105.573	19516	616117	31.5698	0.969297	sor(sor+stal)	0.964731	0.0121466	0.00429446
3	328	13.1	6.5	7.2	98.1	115.3	8.93333	106.7	589.4	500	278.249	7.57833	90.5158	12550.8	388304	30.9386	0.96869
4	261.1	13.7	8.1	4.3	91.2	105.6	8.7	98.4	589.4	500	221.496	7.38039	83.4747	9475.78	304553	32.1402	0.969825
5	373.5	8.9	8.1	5.8	101.9	121.3	7.6	111.6	589.4	500	316.848	6.44723	94.6725	10344	444294	42.952	0.977248
6	440.3	14.9	10.9	7.5	104	114.7	11.1	109.35	589.4	500	373.515	9.41636	92.7638	26011.4	417960	16.0683	0.941412
7	293.1	18	10.2	5.1	126.1	136.8	11.1	131.45	589.4	500	248.643	9.41636	111.512	17315.4	726039	41.9304	0.976706
8	361.4	17.9	9.8	8.6	114.3	122.6	12.1	118.45	589.4	500	306.583	10.2647	100.484	25370.5	531231	20.939	0.954419
85x105 - M
1	679.7	22.6	11.9	9.6	167.6	176	14.7	171.8	589.4	500	576.603	12.4703	145.741	70424.1	1.62087e+06	23.0158	0.958361	sorus vol ratio	25.492	9.65785	3.41456
2	390	20	9.1	7.4	147.8	167.1	12.1667	157.45	589.4	500	330.845	10.3212	133.568	27680.7	1.24769e+06	45.0743	0.978296	sor(sor+stal)	0.958376	0.0127495	0.00450763
3	373.1	19	9	4.3	111.7	128	10.7667	119.85	589.4	500	316.508	9.13358	101.671	20737.5	550291	26.536	0.963684
4	617.7	16.1	7.6	4.2	122.7	128.6	9.3	125.65	589.4	500	524.007	7.88938	106.591	25616.1	634112	24.7544	0.961172
5	597.3	17.1	8.5	4.7	112.1	115.3	10.1	113.7	589.4	500	506.702	8.56804	96.454	29214.9	469850	16.0825	0.941461
6	605.7	15.5	5	3.5	119	129.2	8	124.1	589.4	500	513.828	6.78656	105.277	18586.9	610933	32.869	0.970474
7	525.2	17.7	6.7	4	105.4	108.5	9.46667	106.95	589.4	500	445.538	8.03077	90.7279	22567.8	391039	17.3274	0.945437
8	320.6	16.8	8.5	5.2	88.1	105.6	10.1667	96.85	589.4	500	271.971	8.62459	82.1598	15888.8	290387	18.2762	0.948123
